# Supplementary material for: A cluster-randomized crossover trial of organic diet impact on biomarkers of exposure to pesticides and biomarkers of oxidative stress/inflammation in primary school children
Source: PubMed Central journal article supplement (PMC6726134; doi:10.1371/journal.pone.0219420), 2019-09-04
Supplement: pone.0219420.s005.pdf [file pone.0219420.s005.pdf]

CYPRUS INTERNATIONAL INSTITUTE  
FOR ENVIRONMENTAL & PUBLIC HEALTH

# S3 Questionnaires

ID Number

## FOOD HABITS QUESTIONNAIRE

**CHILD'S FIRST AND LAST NAME:** .....

**DATE:** .....

In the last month, how many times have you consumed the following foods: e.g., if you consumed one glass of milk once per day, then you would write 1 in the column times/day and 7 in the column times/week. If it is once per month, then you would write 1 in the column times/month. If you don't remember or you don't know, then simply mark  $\surd$  in the relevant box (see the example below).

| Food                                              | Consumption                 | Frequency |           |            |             |                                   |
|---------------------------------------------------|-----------------------------|-----------|-----------|------------|-------------|-----------------------------------|
|                                                   |                             | Never     | Times/Day | Times/Week | Times/Month | I don't remember/<br>I don't know |
| Milk (glass of water, 250ml)                      | 1 glass/day                 |           | 1         | 7          |             |                                   |
|                                                   | 2 glasses/day               |           |           |            | 2           |                                   |
| Yogurt, Full (Packaging 200g)                     | 3 servings/ week            |           |           | 3          |             |                                   |
| Meat (portion=90gr)                               | 2 μερίδες/1 ημέρα/εβδομάδα  |           | 2         | 1          |             |                                   |
|                                                   | 2 μερίδες/2 ημέρες/εβδομάδα |           | 2         | 2          |             |                                   |
|                                                   | Ποτέ                        | $\surd$   |           |            |             |                                   |
| Bread (slice=30gr)                                | 2 slices/ημέρα              |           | 2         | 7          |             |                                   |
| Cheese (portion=30gr)                             | 2 portions/week             |           |           | 2          |             |                                   |
| Boiled Vegetables , e.g. cauliflower etc. (½ cup) | 1 cup/day                   |           | 2 (1×2)   | 7          |             |                                   |
|                                                   | 2 cups/ week                |           |           | 4 (2×2)    |             |                                   |
| Legumes (½ cup)                                   | 3 cups/week                 |           |           |            | 6 (3×2)     |                                   |
| Fruits (number)                                   | 3 fruits/day                |           | 3         | 7          |             |                                   |

## QUESTIONNAIRE

| FOOD                                                                                               | FREQUENCY |               |                |                 |                                         |
|----------------------------------------------------------------------------------------------------|-----------|---------------|----------------|-----------------|-----------------------------------------|
|                                                                                                    | Never     | Times/<br>Day | Times/<br>Week | Times/<br>Month | I don't<br>remember/<br>I don't<br>know |
| <b>1. Milk</b> (portion=size of glass of water, 250ml)                                             |           |               |                |                 |                                         |
| a. Fresh whole                                                                                     |           |               |                |                 |                                         |
| b. Fresh low-fat                                                                                   |           |               |                |                 |                                         |
| c. Fresh fat-free                                                                                  |           |               |                |                 |                                         |
| d. Condensed whole                                                                                 |           |               |                |                 |                                         |
| e. Condensed low-fat                                                                               |           |               |                |                 |                                         |
| f. Condensed fat-free                                                                              |           |               |                |                 |                                         |
| g. Sweetened                                                                                       |           |               |                |                 |                                         |
| h. Chocolate                                                                                       |           |               |                |                 |                                         |
| <b>2. Yogurt (plain or with fruits)</b> (small package of 200g)                                    |           |               |                |                 |                                         |
| a. Full                                                                                            |           |               |                |                 |                                         |
| b. Low-fat                                                                                         |           |               |                |                 |                                         |
| c. Fat-free                                                                                        |           |               |                |                 |                                         |
| <b>3. Cheese</b> (portions are about the size of a matchbox, portion=30gr)                         |           |               |                |                 |                                         |
| a. Parmesan, Graviera, Kasseri, Cheddar                                                            |           |               |                |                 |                                         |
| b. Feta, Halloumi, Fresh Anari, Edam                                                               |           |               |                |                 |                                         |
| c. Soft or Cream Cheeses and Spreads (e.g., Cottage, Philadelphia, La vache qui rit)               |           |               |                |                 |                                         |
| <b>Is the cheese that you usually eat low in fat?</b> (Mark $\checkmark$ in the corresponding box) |           |               |                |                 |                                         |
| a. Never                                                                                           |           |               |                |                 |                                         |
| b. Sometimes                                                                                       |           |               |                |                 |                                         |
| c. Frequently                                                                                      |           |               |                |                 |                                         |
| d. I don't remember/I don't know                                                                   |           |               |                |                 |                                         |
| <b>4. Eggs</b> (I don't know)                                                                      |           |               |                |                 |                                         |
|                                                                                                    |           |               |                |                 |                                         |

| FOOD                                                                  | FREQUENCY |               |                |                 |                                         |
|-----------------------------------------------------------------------|-----------|---------------|----------------|-----------------|-----------------------------------------|
|                                                                       | Never     | Times/<br>Day | Times/<br>Week | Times/<br>Month | I don't<br>remember/<br>I don't<br>know |
| <b>5. Morning cereals (medium-sized bowl)</b>                         |           |               |                |                 |                                         |
| a. Cornflakes, Rice-Krispies, other cereals low in fiber              |           |               |                |                 |                                         |
| b. All-Bran, Fruit 'n' Fiber, Muesli, other cereals high in fiber     |           |               |                |                 |                                         |
| c. chocolate or sweetened, e.g.,.. Coco-Pops, Frosties                |           |               |                |                 |                                         |
| <b>6. Bread, buns, loaf, pita, toast, crouttons (φέτα/slice=30γρ)</b> |           |               |                |                 |                                         |
| a. White                                                              |           |               |                |                 |                                         |
| b. Village bread/Simit                                                |           |               |                |                 |                                         |
| c. Black                                                              |           |               |                |                 |                                         |
| d. Wheat/Multi-Seeds                                                  |           |               |                |                 |                                         |
| <b>7. Wheat (portion= ½ cup)</b>                                      |           |               |                |                 |                                         |
| a. Rice                                                               |           |               |                |                 |                                         |
| b. Bulgur                                                             |           |               |                |                 |                                         |
| c. Trahana                                                            |           |               |                |                 |                                         |
| <b>8. Pasta</b>                                                       |           |               |                |                 |                                         |
| a. Pasta, Orzo (porion= ½ cup)                                        |           |               |                |                 |                                         |
| b. Stuffed Pasta (e.g., Ravioli, Tortellini) (portion= ½ cup)         |           |               |                |                 |                                         |
| c. Pastitsio (one medium-sized piece) (number)                        |           |               |                |                 |                                         |
| <b>9. Potatoes</b>                                                    |           |               |                |                 |                                         |
| a. Fried (portion= 20-25 potatoes)                                    |           |               |                |                 |                                         |
| b. Boiled (portion= 2 small potatoes – 90 gr)                         |           |               |                |                 |                                         |
| c. Baked (portion= 2 small potatoes – 90 gr)                          |           |               |                |                 |                                         |
| d. Puree (portion=½ cup)                                              |           |               |                |                 |                                         |
| <b>10. Legumes e.g., lentils, beans (portion=½ cup)</b>               |           |               |                |                 |                                         |

| FOOD                                                                                                                              | FREQUENCY |               |                |                 |                                         |
|-----------------------------------------------------------------------------------------------------------------------------------|-----------|---------------|----------------|-----------------|-----------------------------------------|
|                                                                                                                                   | Never     | Times/<br>Day | Times/<br>Week | Times/<br>Month | I don't<br>remember/<br>I don't<br>know |
| <b>11. Meat, Meat and fish items</b>                                                                                              |           |               |                |                 |                                         |
| <b>a.</b> Meat or minced meat: pork (e.g., steak, meatballs, souvlaki, souvla) (portion=90gr)                                     |           |               |                |                 |                                         |
| <b>b.</b> Meat: lamb/goat (e.g., souvla, kleftiko) (portion=90gr)                                                                 |           |               |                |                 |                                         |
| <b>c.</b> Meat or minced meat: beef (e.g., steak, hamburger) (portion=90gr)                                                       |           |               |                |                 |                                         |
| <b>d.</b> Chicken or rabbit (portion=90gr)                                                                                        |           |               |                |                 |                                         |
| <b>e.</b> Liver (portion=90gr)                                                                                                    |           |               |                |                 |                                         |
| <b>f.</b> Sausages (portion=1 piece) (accept the times that are used specifically for sandwiches)                                 |           |               |                |                 |                                         |
| <b>i.</b> Salami, bacon                                                                                                           |           |               |                |                 |                                         |
| <b>ii.</b> Lountza, ham                                                                                                           |           |               |                |                 |                                         |
| <b>g.</b> Sausages (portion=1 Frankfurt Sausage) (except those used in loukanokopites)                                            |           |               |                |                 |                                         |
| <b>h.</b> Canned meat (e.g., ZWAN) (portion=120gr)                                                                                |           |               |                |                 |                                         |
| <b>i.</b> Canned fish (e.g., tuna) (portion=120gr)                                                                                |           |               |                |                 |                                         |
| <b>j.</b> fresh or frozen fish, seafood (calamari, octopus, etc.) (portion=90gr)                                                  |           |               |                |                 |                                         |
| <b>12. Fruits and Vegetables</b>                                                                                                  |           |               |                |                 |                                         |
| <b>a.</b> Raw vegetables, salads (portion=1 cup)                                                                                  |           |               |                |                 |                                         |
| <b>b.</b> Cooked vegetables: greens, beans, cauliflower, etc. (portion=1/2 cup)                                                   |           |               |                |                 |                                         |
| <b>c.</b> Fresh fruits (portion=1 apple, 1 medium cluster of grapes, 15 cherries, 2 apricots, 1 medium-sized slice of watermelon) |           |               |                |                 |                                         |
| <b>d.</b> Fresh juice from fresh fruits or vegetables (glass of water, 250ml)                                                     |           |               |                |                 |                                         |
| <b>13. Oils, Spreads, and Olives</b> (which are used in cooking, served to compliment the main dish, and/or as bread spreads)     |           |               |                |                 |                                         |
| <b>a.</b> Olive oil (tablespoon)                                                                                                  |           |               |                |                 |                                         |
| <b>b.</b> Seed oil, Sunflower oil, etc. (tablespoon)                                                                              |           |               |                |                 |                                         |
| <b>c.</b> Margarine (teaspoon)                                                                                                    |           |               |                |                 |                                         |
| <b>d.</b> Low-fat margarine (e.g., Flora light/Vitalite) (teaspoon)                                                               |           |               |                |                 |                                         |
| <b>e.</b> Butter (teaspoon)                                                                                                       |           |               |                |                 |                                         |
| <b>f.</b> Mayonnaise (teaspoon)                                                                                                   |           |               |                |                 |                                         |
| <b>g.</b> Olives (number)                                                                                                         |           |               |                |                 |                                         |

| FOOD                                                        | FREQUENCY |               |                |                 |                                         |
|-------------------------------------------------------------|-----------|---------------|----------------|-----------------|-----------------------------------------|
|                                                             | Never     | Times/<br>Day | Times/<br>Week | Times/<br>Month | I don't<br>remember/<br>I don't<br>know |
| <b>14. Sugar, honey, marmalade, etc.</b>                    |           |               |                |                 |                                         |
| a. Sugar (teaspoon)                                         |           |               |                |                 |                                         |
| b. Honey (teaspoon)                                         |           |               |                |                 |                                         |
| c. Marmalade (etc.)                                         |           |               |                |                 |                                         |
| d. Fruit Compote (portion=1/2 cup)                          |           |               |                |                 |                                         |
| <b>15. Chocolates, biscuits, ice-cream, sweets, cake</b>    |           |               |                |                 |                                         |
| a. Merenda e.g., Nutella (teaspoon)                         |           |               |                |                 |                                         |
| b. Chocolates (e.g., one chocolate<br>ION=45gr) List .....  |           |               |                |                 |                                         |
| c. Wafers (e.g., one σοκοπρέτα=40gr)                        |           |               |                |                 |                                         |
| d. Cookies (portion=1 cookie)                               |           |               |                |                 |                                         |
| e. Ice-cream (portion=1 scoop)                              |           |               |                |                 |                                         |
| f. Creams (e.g., pudding, mousse) (1 medium-<br>sized bowl) |           |               |                |                 |                                         |
| g. Cake, tarts, pie, sweets (1 medium-sized<br>piece)       |           |               |                |                 |                                         |
| <b>16. Snacks and meals</b>                                 |           |               |                |                 |                                         |
| a. Cheese pies, souffle (number)                            |           |               |                |                 |                                         |
| b. Sausage pie, chicken pie (number)                        |           |               |                |                 |                                         |
| c. Tahinopita, olive pie (number)                           |           |               |                |                 |                                         |
| d. Croissant, donuts (number)                               |           |               |                |                 |                                         |
| e. Sandwich (ham-cheese, lountza-halloumi)<br>(number)      |           |               |                |                 |                                         |
| f. Sandwich (Cheese or halloumi) (number)                   |           |               |                |                 |                                         |
| g. Sandwich (tuna) (number)                                 |           |               |                |                 |                                         |
| h. Pizza (one large-sized slice) (number)                   |           |               |                |                 |                                         |
| i. Meals «Fast Food» (e.g., Mc Donald's,<br>KFC) (number)   |           |               |                |                 |                                         |
| j. Moussaka (one medium-sized piece)<br>(number)            |           |               |                |                 |                                         |
| k. Stuffed foods or dolmas (number)                         |           |               |                |                 |                                         |

| FOOD                                                     | FREQUENCY |               |                |                 |                                         |
|----------------------------------------------------------|-----------|---------------|----------------|-----------------|-----------------------------------------|
|                                                          | Never     | Times/<br>Day | Times/<br>Week | Times/<br>Month | I don't<br>remember/<br>I don't<br>know |
| <i>17. Crisps, potato chips, popcorn</i> (smalls bags)   |           |               |                |                 |                                         |
| <i>18. Nuts</i> (small coffee cups)                      |           |               |                |                 |                                         |
| <b>19. Drinks and Coffee</b>                             |           |               |                |                 |                                         |
| <b>a. Water</b> (glasses)                                |           |               |                |                 |                                         |
| <b>b. Soda</b> (Cans, 330cc)                             |           |               |                |                 |                                         |
| <b>i. Soda</b> with sugar                                |           |               |                |                 |                                         |
| <b>ii. Sugar-free soda</b> (diet)                        |           |               |                |                 |                                         |
| <b>c. Juice</b> (1 box/1 glass 250ml)                    |           |               |                |                 |                                         |
| <b>i. Concentrated juices</b> (e.g., Lanitis, KEAN etc.) |           |               |                |                 |                                         |
| <b>ii. Fruit juices</b> (e.g., Keanita)                  |           |               |                |                 |                                         |
| <b>d. Other drinks</b> (1 box/bottle)                    |           |               |                |                 |                                         |
| <b>i. Isotonic</b> (e.g., Lucozade, Gatorade)            |           |               |                |                 |                                         |
| <b>ii. Energy drinks</b> (e.g., Redbull, Shark)          |           |               |                |                 |                                         |
| <b>20. Supplements</b>                                   |           |               |                |                 |                                         |
| <b>a. Vitamins</b> (specify .....)                       |           |               |                |                 |                                         |
| <b>b. Other</b> (e.g., protein drinks) (specify .....)   |           |               |                |                 |                                         |
| <b>21. Other foods</b>                                   |           |               |                |                 |                                         |
| <b>a.</b> .....                                          |           |               |                |                 |                                         |
| <b>b.</b> .....                                          |           |               |                |                 |                                         |

**Thank you.**

Κωδικός Αριθμός

**ΕΡΩΤΗΜΑΤΟΛΟΓΙΟ ΣΥΧΝΟΤΗΤΑΣ ΔΙΑΤΡΟΦΗΣ**
**ΟΝΟΜΑΤΕΠΩΝΥΜΟ ΠΑΙΔΙΟΥ:** .....

**ΗΜΕΡΟΜΗΝΙΑ:** .....

Τον τελευταίο μήνα, πόσες φορές κατανάλωσες τις παρακάτω τροφές: π.χ. αν κατανάλωσες 1 ποτήρι γάλα 1 φορά την ημέρα τότε θα γράψεις 1 στη στήλη φορές/ημέρα και 7 στη στήλη φορές/εβδομάδα, αν είναι 1 φορά την εβδομάδα τότε θα γράψεις 1 στη στήλη φορές/εβδομάδα, αν είναι 1 φορά το μήνα τότε θα γράψεις 1 κάτω από τη στήλη φορές/μήνα κι αν είναι ποτέ ή δεν θυμάσαι/δεν γνωρίζεις τότε θα σημειώσεις √ στο αντίστοιχο κουτάκι (βλέπε πίνακα παρακάτω).

| Τρόφιμα                                                     | Κατανάλωση                      | Συχνότητα |                 |                    |                |                                   |
|-------------------------------------------------------------|---------------------------------|-----------|-----------------|--------------------|----------------|-----------------------------------|
|                                                             |                                 | Ποτέ      | Φορές/<br>ημέρα | Φορές/<br>εβδομάδα | Φορές/<br>μήνα | Δεν<br>θυμάμαι/<br>Δεν<br>γνωρίζω |
| Γάλα (ποτήρι του νερού, 250ml)                              | 1 ποτήρι/ημέρα                  |           | 1               | 7                  |                |                                   |
|                                                             | 2 ποτήρια/μήνα                  |           |                 |                    | 2              |                                   |
| Γιαούρτι πλήρες (συσκευασία 200γρ)                          | 3 κεσεδάκια/<br>εβδομάδα        |           |                 | 3                  |                |                                   |
| Κρέας (μερίδα=90γρ)                                         | 2 μερίδες/1 ημέρα/<br>εβδομάδα  |           | 2               | 1                  |                |                                   |
|                                                             | 2 μερίδες/2 ημέρες/<br>εβδομάδα |           | 2               | 2                  |                |                                   |
|                                                             | Ποτέ                            | √         |                 |                    |                |                                   |
| Ψωμί (φέτα=30γρ)                                            | 2 φέτες/ημέρα                   |           | 2               | 7                  |                |                                   |
| Τυρί (μερίδα=30γρ)                                          | 2 μερίδες/εβδομάδα              |           |                 | 2                  |                |                                   |
| Λαχανικά βραστά ,<br>π.χ. κουνουπίδι κ.τ.λ.<br>(½ φλιτζάνι) | 1 φλιτζάνι/ημέρα                |           | 2 (1×2)         | 7                  |                |                                   |
|                                                             | 2 φλιτζάνια/ εβδομάδα           |           |                 | 4 (2×2)            |                |                                   |
| Όσπρια (½ φλιτζάνι)                                         | 3 φλιτζάνια/μήνα                |           |                 |                    | 6 (3×2)        |                                   |
| Φρούτα (αριθμός)                                            | 3 φρούτα/ημέρα                  |           | 3               | 7                  |                |                                   |

**ΕΡΩΤΗΜΑΤΟΛΟΓΙΟ**

| ΤΡΟΦΙΜΑ                                                                             | ΣΥΧΝΟΤΗΤΑ |                 |                    |                |                                   |
|-------------------------------------------------------------------------------------|-----------|-----------------|--------------------|----------------|-----------------------------------|
|                                                                                     | Ποτέ      | Φορές/<br>ημέρα | Φορές/<br>εβδομάδα | Φορές/<br>μήνα | Δεν<br>θυμάμαι/<br>Δεν<br>γνωρίζω |
| <b>1. Γάλα</b> (ένα ποτήρι νερού, 250ml)                                            |           |                 |                    |                |                                   |
| α. φρέσκο πλήρες                                                                    |           |                 |                    |                |                                   |
| β. φρέσκο ημιάπαχο                                                                  |           |                 |                    |                |                                   |
| γ. φρέσκο άπαχο                                                                     |           |                 |                    |                |                                   |
| δ. εβαπορέ πλήρες                                                                   |           |                 |                    |                |                                   |
| ε. εβαπορέ ημιάπαχο                                                                 |           |                 |                    |                |                                   |
| στ. εβαπορέ άπαχο                                                                   |           |                 |                    |                |                                   |
| ζ. ζαχαρούχο                                                                        |           |                 |                    |                |                                   |
| η. σοκολατούχο                                                                      |           |                 |                    |                |                                   |
| <b>2. Γιαούρτι (σκέτο ή με φρούτα)</b> (μικρή συσκευασία 200γρ)                     |           |                 |                    |                |                                   |
| α. πλήρες                                                                           |           |                 |                    |                |                                   |
| β. ημιάπαχο                                                                         |           |                 |                    |                |                                   |
| γ. άπαχο                                                                            |           |                 |                    |                |                                   |
| <b>3. Τυρί</b> (μερίδες μεγέθους σπυρτόκουτου, μερίδα=30γρ)                         |           |                 |                    |                |                                   |
| α. κεφαλοτύρι, γραβιέρα, κασέρι, Cheddar                                            |           |                 |                    |                |                                   |
| β. φέτα, χαλούμι, φρέσκα αναρή, Edam                                                |           |                 |                    |                |                                   |
| γ. μαλακό τυρί/κρεμώδες (π.χ. Cottage, Philadelphia, La vache qui rit)              |           |                 |                    |                |                                   |
| <b>Το τυρί που τρως είναι χαμηλό σε λιπαρά;</b> (σημείωσε √ στο αντίστοιχο κουτάκι) |           |                 |                    |                |                                   |
| α. ποτέ                                                                             |           |                 |                    |                |                                   |
| β. μερικές φορές                                                                    |           |                 |                    |                |                                   |
| γ. συνήθως/πάντα                                                                    |           |                 |                    |                |                                   |
| δ. δεν θυμάμαι/δεν γνωρίζω                                                          |           |                 |                    |                |                                   |
| <b>4. Αυγά</b> (αριθμός)                                                            |           |                 |                    |                |                                   |
|                                                                                     |           |                 |                    |                |                                   |

| ΤΡΟΦΙΜΑ                                                               | ΣΥΧΝΟΤΗΤΑ |                 |                    |                |                                   |
|-----------------------------------------------------------------------|-----------|-----------------|--------------------|----------------|-----------------------------------|
|                                                                       | Ποτέ      | Φορές/<br>ημέρα | Φορές/<br>εβδομάδα | Φορές/<br>μήνα | Δεν<br>θυμάμαι/<br>Δεν<br>γνωρίζω |
| <b>5. Δημητριακά προγεύματος (μέτριο μπολ)</b>                        |           |                 |                    |                |                                   |
| α. Cornflakes, Rice-Krispies, άλλα χαμηλά σε φυτικές ίνες)            |           |                 |                    |                |                                   |
| β. All-Bran, Fruit 'n' Fiber, Muesli, άλλα ψηλά σε φυτικές ίνες       |           |                 |                    |                |                                   |
| γ. σοκολατούχα, ζαχαρούχα, π.χ. Coco-Pops, Frosties                   |           |                 |                    |                |                                   |
| <b>6. Ψωμί, φραντζόλα, πίτα, φρυγανιά, παξιμάδι (φέτα/slice=30γρ)</b> |           |                 |                    |                |                                   |
| α. άσπρο                                                              |           |                 |                    |                |                                   |
| β. χωριάτικο ψωμί/κουλούρι                                            |           |                 |                    |                |                                   |
| γ. μαύρο                                                              |           |                 |                    |                |                                   |
| δ. πολύσπορο                                                          |           |                 |                    |                |                                   |
| <b>7. Δημητριακά (μερίδα= ½ φλιτζάνι)</b>                             |           |                 |                    |                |                                   |
| α. ρύζι                                                               |           |                 |                    |                |                                   |
| β. πλιγούρι (πουργούρι)                                               |           |                 |                    |                |                                   |
| γ. τραχανάς                                                           |           |                 |                    |                |                                   |
| <b>8. Ζυμαρικά</b>                                                    |           |                 |                    |                |                                   |
| α. μακαρόνια, κριθαράκι (μερίδα= ½ φλιτζάνι)                          |           |                 |                    |                |                                   |
| β. γεμιστά ζυμαρικά (π.χ. ραβιόλες, τορτελλίνια) (μερίδα= ½ φλιτζάνι) |           |                 |                    |                |                                   |
| γ. μακαρόνια φούρνου (ένα μέτριο κομμάτι) (αριθμός)                   |           |                 |                    |                |                                   |
| <b>9. Πατάτες</b>                                                     |           |                 |                    |                |                                   |
| α. τηγανιτές (μερίδα= 20-25 πατάτες)                                  |           |                 |                    |                |                                   |
| β. βραστές (μερίδα= 2 μικρές πατάτες - 90γρ)                          |           |                 |                    |                |                                   |
| γ. φούρνου (μερίδα= 2 μικρές πατάτες - 90γρ)                          |           |                 |                    |                |                                   |
| δ. πουρέ (μερίδα= ½ φλιτζάνι)                                         |           |                 |                    |                |                                   |
| <b>10. Όσπρια π.χ. φακές, φασόλια (μερίδα=½ φλιτζάνι)</b>             |           |                 |                    |                |                                   |

| ΤΡΟΦΙΜΑ                                                                                                                                            | ΣΥΧΝΟΤΗΤΑ |                 |                    |                |                                   |
|----------------------------------------------------------------------------------------------------------------------------------------------------|-----------|-----------------|--------------------|----------------|-----------------------------------|
|                                                                                                                                                    | Ποτέ      | Φορές/<br>ημέρα | Φορές/<br>εβδομάδα | Φορές/<br>μήνα | Δεν<br>θυμάμαι/<br>Δεν<br>γνωρίζω |
| <b>11. Κρέας, προϊόντα κρέατος και ψάρια</b>                                                                                                       |           |                 |                    |                |                                   |
| <b>α.</b> κρέας ή κιμάς: χοιρινό (π.χ. μπριζόλα, σιεφταλιές, σουβλάκι, χοιρινή σούβλα) (μερίδα=90γρ)                                               |           |                 |                    |                |                                   |
| <b>β.</b> κρέας: αρνί/κατσίκι (π.χ. αρνίσια σούβλα, αρνί στο φούρνο, κλέφτικο) (μερίδα=90γρ)                                                       |           |                 |                    |                |                                   |
| <b>γ.</b> κρέας ή κιμάς: βοδινό (π.χ. στέικ, hamburger) (μερίδα=90γρ)                                                                              |           |                 |                    |                |                                   |
| <b>δ.</b> κοτόπουλο ή κουνέλι (μερίδα=90γρ)                                                                                                        |           |                 |                    |                |                                   |
| <b>ε.</b> συκώτι (μερίδα=90γρ)                                                                                                                     |           |                 |                    |                |                                   |
| <b>στ.</b> αλλαντικά (μερίδα=1 φέτα) (εκτός αυτών που περιέχονται σε σάντουιτς)                                                                    |           |                 |                    |                |                                   |
| <b>i.</b> σαλάμι, μπέικον, μουρτατέλα                                                                                                              |           |                 |                    |                |                                   |
| <b>ii.</b> λούντζα, χαμ                                                                                                                            |           |                 |                    |                |                                   |
| <b>ζ.</b> λουκάνικα (μερίδα=1 μέγεθος φραγκφούρτης) (εκτός αυτών που περιέχονται σε λουκανικόπιτες)                                                |           |                 |                    |                |                                   |
| <b>η.</b> κονσέρβες κρέατος (π.χ. ZWAN) (μερίδα=120γρ)                                                                                             |           |                 |                    |                |                                   |
| <b>θ.</b> κονσέρβες ψαριού (π.χ. τόνος) (μερίδα=120γρ)                                                                                             |           |                 |                    |                |                                   |
| <b>ι.</b> ψάρι φρέσκο ή κατεψυγμένο, θαλασσίνα (χταπόδι, καλαμάρι κ.α.) (μερίδα=90γρ)                                                              |           |                 |                    |                |                                   |
| <b>12. Λαχανικά και φρούτα</b>                                                                                                                     |           |                 |                    |                |                                   |
| <b>α.</b> λαχανικά ωμά, σαλάτες (μερίδα=1 φλιτζάνι)                                                                                                |           |                 |                    |                |                                   |
| <b>β.</b> μαγειρευμένα λαχανικά: χόρτα, φασολάκι, κουνουπίδι κ.τ.λ. (μερίδα=½ φλιτζάνι)                                                            |           |                 |                    |                |                                   |
| <b>γ.</b> φρέσκα φρούτα (μερίδα=1 μήλο, 1 μέτριο τσαμπί σταφύλι, 15 κεράσια, 2 χρυσόμηλα, 1 μέτρια φέτα καρπούζι)                                  |           |                 |                    |                |                                   |
| <b>δ.</b> χυμοί από φρέσκα φρούτα ή λαχανικά (ποτήρι νερού, 250ml)                                                                                 |           |                 |                    |                |                                   |
| <b>13. Λάδι, αλείμματα, και ελιές</b> (που χρησιμοποιούνται στο μαγείρεμα, προστίθενται την διάρκεια του φαγητού στο τραπέζι, αλείφονται στο ψωμί) |           |                 |                    |                |                                   |
| <b>α.</b> ελαιόλαδο (κουταλιές σούπας)                                                                                                             |           |                 |                    |                |                                   |
| <b>β.</b> σπορέλαιο, ηλιανθέλαιο κ.τ.λ. (κουταλιές σούπας)                                                                                         |           |                 |                    |                |                                   |
| <b>γ.</b> μαργαρίνη (κουταλάκια γλυκού)                                                                                                            |           |                 |                    |                |                                   |
| <b>δ.</b> μαργαρίνη χαμηλή σε λιπαρά (π.χ. Flora light/Vitalite) (κουταλάκια γλυκού)                                                               |           |                 |                    |                |                                   |
| <b>ε.</b> βούτυρο (κουταλάκια γλυκού)                                                                                                              |           |                 |                    |                |                                   |
| <b>στ.</b> μαγιονέζα (κουταλάκια γλυκού)                                                                                                           |           |                 |                    |                |                                   |

| ΤΡΟΦΙΜΑ                                                        | ΣΥΧΝΟΤΗΤΑ |                 |                    |                |                                   |
|----------------------------------------------------------------|-----------|-----------------|--------------------|----------------|-----------------------------------|
|                                                                | Ποτέ      | Φορές/<br>ημέρα | Φορές/<br>εβδομάδα | Φορές/<br>μήνα | Δεν<br>θυμάμαι/<br>Δεν<br>γνωρίζω |
| ζ. ελιές (αριθμός)                                             |           |                 |                    |                |                                   |
| <b>14. Ζάχαρη, μέλι, μαρμελάδα κ.τ.λ.</b>                      |           |                 |                    |                |                                   |
| α. ζάχαρη (κουταλάκια γλυκού)                                  |           |                 |                    |                |                                   |
| β. μέλι (κουταλάκια γλυκού)                                    |           |                 |                    |                |                                   |
| γ. μαρμελάδα & γλυκά κουταλιού<br>(κουταλάκια γλυκού)          |           |                 |                    |                |                                   |
| δ. κομπόστα φρούτων (μερίδα=½ φλιτζάνι)                        |           |                 |                    |                |                                   |
| <b>15. Σοκολάτες, μπισκότα, παγωτά, γλυκά, κέικ</b>            |           |                 |                    |                |                                   |
| α. μερέντα π.χ. nutella (κουταλάκια γλυκού)                    |           |                 |                    |                |                                   |
| β. σοκολάτες (π.χ. μια σοκολάτα ION=45γρ)<br>προσδιόρισε ..... |           |                 |                    |                |                                   |
| γ. γκοφρέτες (π.χ. μια σοκοφρέτα=40γρ)                         |           |                 |                    |                |                                   |
| δ. μπισκότα, κουλουράκια (μερίδα=1<br>μπισκότο ή κουλουράκι)   |           |                 |                    |                |                                   |
| ε. παγωτά (μερίδα=1 μπαλάκι/scoop)                             |           |                 |                    |                |                                   |
| στ. κρέμες (π.χ. καραμελέ, μους) (1 μέτριο<br>μπολ)            |           |                 |                    |                |                                   |
| ζ. κέικ, τούρτες, τάρτες, γλυκίσματα (1 μέτριο<br>κομμάτι)     |           |                 |                    |                |                                   |
| <b>16. Σνακς και γεύματα</b>                                   |           |                 |                    |                |                                   |
| α. τυρόπιτες, πουρέκια, σουφλέ (αριθμός)                       |           |                 |                    |                |                                   |
| β. λουκανικόπιτες, κοτόπιτες (αριθμός)                         |           |                 |                    |                |                                   |
| γ. ταχινόπιτες, ελιόπιτες (αριθμός)                            |           |                 |                    |                |                                   |
| β. κρουασάν, ντόνατς (αριθμός)                                 |           |                 |                    |                |                                   |
| δ. σάντουιτς (ζαμπόν-τυρί, λούντζα-χαλούμι)<br>(αριθμός)       |           |                 |                    |                |                                   |
| ε. σάντουιτς (τυρί ή χαλούμι) (αριθμός)                        |           |                 |                    |                |                                   |
| στ. σάντουιτς (τόνος κ.α.) (αριθμός)                           |           |                 |                    |                |                                   |
| ζ. πίτσα (ένα κομμάτι από μεγάλο μεγέθους<br>πίτσα) (αριθμός)  |           |                 |                    |                |                                   |
| η. γεύματα «φαστ φουντ» (π.χ. Mc Donald's,<br>KFC) (αριθμός)   |           |                 |                    |                |                                   |
| θ. μουςακάς (ένα μέτριο κομμάτι) (αριθμός)                     |           |                 |                    |                |                                   |

| ΤΡΟΦΙΜΑ                                                      | ΣΥΧΝΟΤΗΤΑ |                 |                    |                |                                   |
|--------------------------------------------------------------|-----------|-----------------|--------------------|----------------|-----------------------------------|
|                                                              | Ποτέ      | Φορές/<br>ημέρα | Φορές/<br>εβδομάδα | Φορές/<br>μήνα | Δεν<br>θυμάμαι/<br>Δεν<br>γνωρίζω |
| <b>i.</b> γεμιστά ή ντολμάδες (αριθμός)                      |           |                 |                    |                |                                   |
| <b>17. Γαριδάκια, πατατάκια, ποπ κορν</b> (μικρά σακουλάκια) |           |                 |                    |                |                                   |
| <b>18. Ξηροί καρποί</b> (φλιτζανάκια καφέ)                   |           |                 |                    |                |                                   |
| <b>19. Ποτά και καφέδες</b>                                  |           |                 |                    |                |                                   |
| <b>a.</b> νερό (ποτήρια)                                     |           |                 |                    |                |                                   |
| <b>β. αναψυκτικά</b> (τενεκεδάκια, 330cc)                    |           |                 |                    |                |                                   |
| <b>i.</b> αναψυκτικά με ζάχαρη                               |           |                 |                    |                |                                   |
| <b>ii.</b> αναψυκτικά χωρίς ζάχαρη (diet)                    |           |                 |                    |                |                                   |
| <b>γ. χυμοί</b> (1 κουτί/1 ποτήρι 250ml)                     |           |                 |                    |                |                                   |
| <b>i.</b> χυμοί συμπυκνωμένοι (π.χ. Λανίτη, KEAN κ.τ.λ.)     |           |                 |                    |                |                                   |
| <b>ii.</b> φρουτοποτά (π.χ. Κεανίτα)                         |           |                 |                    |                |                                   |
| <b>δ. άλλα ποτά</b> (1 κουτί/μπουκάλι)                       |           |                 |                    |                |                                   |
| <b>i.</b> ισοτονικά (π.χ. Lucozade, Gatorade)                |           |                 |                    |                |                                   |
| <b>ii.</b> energy drinks (π.χ. Redbull, Shark)               |           |                 |                    |                |                                   |
| <b>20. Συμπληρώματα</b>                                      |           |                 |                    |                |                                   |
| <b>a.</b> βιταμίνες (προσδιόρισε .....                       |           |                 |                    |                |                                   |
| <b>β.</b> άλλα (π.χ. πρωτεΐνες)<br>(προσδιόρισε .....        |           |                 |                    |                |                                   |
| <b>21. Άλλα φαγητά</b>                                       |           |                 |                    |                |                                   |
| <b>a.</b> .....                                              |           |                 |                    |                |                                   |
| <b>β.</b> .....                                              |           |                 |                    |                |                                   |

Ευχαριστούμε.

## ΕΡΩΤΗΜΑΤΟΛΟΓΙΟ

### Βιολογική Διατροφή και Υγεία Παιδιών

|                              |  |      |  |
|------------------------------|--|------|--|
| Child's First and Last Name  |  |      |  |
| Parent's First and Last Name |  |      |  |
| Primary Telephone            |  |      |  |
| Questionnaire ID             |  | Date |  |

#### PART A

Please answer the following questions:

1. Education level:

|                      | Mother                   | Father                   |
|----------------------|--------------------------|--------------------------|
| Primary Education    | <input type="checkbox"/> | <input type="checkbox"/> |
| Secondary Education  | <input type="checkbox"/> | <input type="checkbox"/> |
| University/College   | <input type="checkbox"/> | <input type="checkbox"/> |
| Master's/Doctorate's | <input type="checkbox"/> | <input type="checkbox"/> |
| Other.....           | <input type="checkbox"/> | <input type="checkbox"/> |

2. Mother's Occupation:

3. Father's Occupation:

4. City/Village of Residence:

5. ZIP Code:

6. Length of Stay in Current Residence:  months/years

7. How frequently have you used pesticides in your place of residence (including indoor and outdoor areas-garden, grass, lawn, trees) in the past 3 months? By pesticides, we refer to insect repellents, herbicides, insecticides, fungicides, or rat/mouse poisons.

|                   | Outdoors | Indoors |                   |
|-------------------|----------|---------|-------------------|
| Insect repellents |          |         | Times /week/month |
| Insecticides      |          |         | Times /week/month |
| Fungicides        |          |         | Times /week/month |
| Herbicides        |          |         | Times /week/month |
| Rat/Mouse Poison  |          |         | Times /week/month |

If you don't use pesticides, please continue at Part B.

8. When was the most recent use of pesticides in your place of residence? (days, weeks, months, etc.)?

|                   | Outdoors | Indoors |
|-------------------|----------|---------|
| Insect repellents |          |         |
| Insecticides      |          |         |
| Fungicides        |          |         |
| Herbicides        |          |         |
| Rat/Mouse Poison  |          |         |

9. Do you know which pesticides are usually used in your place of residence? Please list them:

### **Part B**

Please answer the following questions with regards to your child participating in the study:

- Child's Gender: Male  Female
- Child's Birthday:
- Does your child have the tendency to put their fingers in their mouth (nail biting, finger/thumb sucking, etc.)?  
Yes  No
- How much time does your child spend in gardens or parks on a weekly basis?  
Garden:  hours/week  
Park:  hours/week

5. How many hours per week does your child spend doing physical activities or sports on a weekly basis?

|                 | Hours/week |
|-----------------|------------|
| Running         |            |
| Cycling         |            |
| Basketball      |            |
| Football/Soccer |            |
| Volleyball      |            |
| Swimming        |            |
| Dance           |            |
| Other<br>.....  |            |

6. How much time does your child spend in passive activities on a weekly basis?

|                | Hours/week |
|----------------|------------|
| Television     |            |
| Computer       |            |
| Tablet         |            |
| Mobile phone   |            |
| Other<br>..... |            |

**Part C (Completed by a Research Member)**

| Date                | Starting Date ( .../.../.....) | Final Date ( .../.../.....) |
|---------------------|--------------------------------|-----------------------------|
| Weight              |                                |                             |
| Height              |                                |                             |
| Waist circumference |                                |                             |

## ΕΡΩΤΗΜΑΤΟΛΟΓΙΟ

### Βιολογική Διατροφή και Υγεία Παιδιών

|                                   |  |            |  |
|-----------------------------------|--|------------|--|
| Όνοματεπώνυμο παιδιού             |  |            |  |
| Όνοματεπώνυμο γονέα               |  |            |  |
| Τηλέφωνο επικοινωνίας<br>(κινητό) |  |            |  |
| Κωδικός ερωτηματολογίου           |  | Ημερομηνία |  |

#### Μέρος Α

Παρακαλώ όπως απαντήσετε τις ακόλουθες ερωτήσεις:

1. Μορφωτικό επίπεδο:

|                          | Μητέρα                   | Πατέρας                  |
|--------------------------|--------------------------|--------------------------|
| Δημοτικό                 | <input type="checkbox"/> | <input type="checkbox"/> |
| Γυμνάσιο-Λύκειο          | <input type="checkbox"/> | <input type="checkbox"/> |
| Πανεπιστήμιο-Κολλέγιο    | <input type="checkbox"/> | <input type="checkbox"/> |
| Μεταπτυχιακό-Διδακτορικό | <input type="checkbox"/> | <input type="checkbox"/> |
| Άλλο .....               | <input type="checkbox"/> | <input type="checkbox"/> |

2. Εργασία μητέρας:

3. Εργασία πατέρα:

4. Πόλη/χωριό διαμονής:

5. Ταχυδρομικός κώδικας:

6. Χρόνος διαμονής στην παρούσα κατοικία:

μήνες/χρόνια

7. Πόσο συχνά χρησιμοποιήσατε φυτοφάρμακα στην οικία σας (εσωτερικό σπιτιού και εξωτερικό σπιτιού-κήπος, γρασίδι, δέντρα) τους τελευταίους 3 μήνες; Όπου φυτοφάρμακα αναφερόμαστε σε ζιζανιοκτόνα ή εντομοκτόνα ή εντομοαπωθητικά ή μυκητοκτόνα ή ποντικοφάρμακα.

|                 | Εξωτερικό σπιτιού | Εσωτερικό σπιτιού |                     |
|-----------------|-------------------|-------------------|---------------------|
| Εντομοαπωθητικά |                   |                   | Φορές /βδομάδα/μήνα |
| Εντομοκτόνα     |                   |                   | Φορές /βδομάδα/μήνα |
| Μυκητοκτόνα     |                   |                   | Φορές /βδομάδα/μήνα |
| Ζιζανιοκτόνα    |                   |                   | Φορές /βδομάδα/μήνα |
| Ποντικοφάρμακα  |                   |                   | Φορές /βδομάδα/μήνα |

Αν δεν χρησιμοποιείτε φυτοφάρμακα, παρακαλώ όπως συνεχίσετε με το Μέρος Β.

8. Πότε έγινε η πιο πρόσφατη χρήση φυτοφαρμάκων στην οικία σας (μέρες, εβδομάδες, μήνες κλπ);

|                 | Εξωτερικό σπιτιού | Εσωτερικό σπιτιού |
|-----------------|-------------------|-------------------|
| Εντομοαπωθητικά |                   |                   |
| Εντομοκτόνα     |                   |                   |
| Μυκητοκτόνα     |                   |                   |
| Ζιζανιοκτόνα    |                   |                   |
| Ποντικοφάρμακα  |                   |                   |

9. Γνωρίζετε ποια φυτοφάρμακα χρησιμοποιείτε συνήθως στην οικία σας; Παρακαλώ ονομάστε τα.

### **Μέρος Β**

Παρακαλώ όπως απαντήσετε τις ακόλουθες ερωτήσεις για το παιδί σας:

- Φύλο παιδιού: Αγόρι  Κορίτσι
- Ημερομηνία γέννησης παιδιού:
- Έχει το παιδί σας τη συνήθεια να βάζει το χέρι στο στόμα του (ονυχοφαγία, πιπίλισμα δακτύλου);  
Ναι  Όχι
- Πόσο χρόνο περνά το παιδί σας σε πάρκα και κήπους σε εβδομαδιαία βάση;  
Κήπος:  ώρες/εβδομάδα  
Πάρκο:  ώρες/εβδομάδα

5. Πόσο χρόνο αφιερώνει το παιδί σας σε αθλοπαιδιές, σε εβδομαδιαία βάση;

|               | Ώρες/εβδομάδα |
|---------------|---------------|
| Τρέξιμο       |               |
| Ποδηλασία     |               |
| Καλαθόσφαιρα  |               |
| Ποδόσφαιρο    |               |
| Πετόσφαιρα    |               |
| Κολύμπι       |               |
| Χορός         |               |
| Άλλο<br>..... |               |

6. Πόσο χρόνο αφιερώνει το παιδί σας σε καθιστικές δραστηριότητες σε εβδομαδιαία βάση;

|               | Ώρες/εβδομάδα |
|---------------|---------------|
| Τηλεόραση     |               |
| Υπολογιστής   |               |
| Tablet        |               |
| Κινητό        |               |
| Άλλο<br>..... |               |

**Μέρος Γ (Θα συμπληρωθεί από μέλος της ερευνητικής ομάδας)**

| Ημερομηνία       | Αρχή μελέτης ( .../.../.....) | Τέλος μελέτης ( .../.../.....) |
|------------------|-------------------------------|--------------------------------|
| Βάρος            |                               |                                |
| Ύψος             |                               |                                |
| Περιφέρεια μέσης |                               |                                |
